# Supplementary material for: Structural insights into the assembly and polyA signal recognition mechanism of the human CPSF complex
Source: eLife. 2017 Dec 23;6:e33111. doi: 10.7554/eLife.33111 (PMC5760199; doi:10.7554/eLife.33111)
Supplement: Figure 1—source data 1. — The table contains a list of the unique and validated cross-linked sites obtained by the xQuest identification search. The ‘id’ column contains the sequence of the two cross-linked peptides followed by the position of their respective cross-linked lysine residue. The ‘Protein1’ and ‘Protein2’ columns list the names of the proteins corresponding to the first and second peptide, respectively. The ‘AbsPos1’ and ‘AbsPos2’ columns indicate the position of the cross-linked residue in the respective proteins according to the Uniprot numbering. The ‘ld.Score’ is a measurement of the quality of the match between a candidate MS2 spectrum and the theoretical spectrum of a query cross-linked peptide pair. The ‘FDR’ is the false discovery rate at the cross-link identification level expressed as a fraction of 100%. [file elife-33111-fig1-data1.xlsx]

## Sheet: Inter
Rank	Id	Protein1	Protein2	Type	XLType	AbsPos1	AbsPos2	deltaAA	Mr	Mz	z	Error_rel.ppm.	nseen	mions	MatchOdds	Xcorrx	Xcorrb	TIC	TicA	TicB	WTIC	intsum	deltaS	ld.Score	FDR	uxID	comment
1	SGAAVCEFFLKAACGK-YQEESKTLSLVSR-a11-b6	CPSF30	CPSF160	xlink	inter-protein xl	46	1241	1195	3391.67	848.926	4	-1.6	2	12	9.98	0.24	0.32	0.52	0.4	0.12	0.09	351	0.71	34.61	0.095	CPSF30:46:x:CPSF160:1241	#N/A
1	KGDQCEFLHEYDMTK-YQEESKTLSLVSR-a1-b6	CPSF30	CPSF160	xlink	inter-protein xl	78	1241	1163	3576.67	895.175	4	-2.2	1	9	8.26	0.14	0.28	0.46	0.07	0.39	0.09	570	0.8	34.08	0.095	CPSF30:78:x:CPSF160:1241	#N/A
1	GPRPLEQVTCYKCGEK-AYCEKQK-a12-b5	CPSF30	FIP1	xlink	inter-protein xl	221	176	45	2984.42	747.113	4	0.2	5	11	11.49	0.33	0.32	0.62	0.41	0.21	0.12	450	0.66	39.96	0.091	CPSF30:221:x:FIP1:176	#N/A
1	MPECYFYSKFGECSNK-FNLFKVQQGR-a9-b5	CPSF30	FIP1	xlink	inter-protein xl	101	220	119	3419.57	855.9	4	-2.8	1	14	10.76	0.28	0.31	0.45	0.16	0.3	0.09	531	0.65	39.22	0.091	CPSF30:101:x:FIP1:220	#N/A
1	CTKGHLAFLSGQ-FNLFKVQQGR-a3-b5	CPSF30	FIP1	xlink	inter-protein xl	234	220	14	2691.39	673.857	4	-0.2	3	13	10.79	0.19	0.39	0.52	0.4	0.12	0.09	398	0.48	38.48	0.091	CPSF30:234:x:FIP1:220	#N/A
1	GPRPLEQVTCYKCGEK-TGNSEKETALPSTK-a12-b6	CPSF30	FIP1	xlink	inter-protein xl	221	231	10	3520.71	881.185	4	-3	3	13	9.8	0.19	0.31	0.38	0.06	0.32	0.07	488	0.24	36.14	0.091	CPSF30:221:x:FIP1:231	#N/A
1	GPRPLEQVTCYKCGEK-FNLFKVQQGR-a12-b5	CPSF30	FIP1	xlink	inter-protein xl	221	220	1	3294.66	824.673	4	-1.1	2	11	9.22	0.23	0.36	0.52	0.13	0.39	0.11	446	0.2	35.84	0.095	CPSF30:221:x:FIP1:220	#N/A
1	GFCKHGPLCR-VYGTTGTKVK-a4-b8	CPSF30	FIP1	xlink	inter-protein xl	133	120	13	2421.22	808.083	3	-2.2	5	9	7.76	0.35	0.11	0.41	0.12	0.29	0.07	767	0.46	33.25	0.095	CPSF30:133:x:FIP1:120	#N/A
1	GPRPLEQVTCYKCGEKGHYANR-AYCEKQKR-a16-b5	CPSF30	FIP1	xlink	inter-protein xl	225	176	49	3838.83	768.774	5	-3.6	2	7	9.28	0.22	0.22	0.36	0.24	0.13	0.07	440	0.43	32.41	0.095	CPSF30:225:x:FIP1:176	#N/A
1	GFCKHGPLCR-KANSSVGK-a4-b1	CPSF30	FIP1	xlink	inter-protein xl	133	272	139	2158.07	540.526	4	-1.9	2	10	8.67	0.21	0.37	0.27	0.08	0.19	0.05	284	0	31.19	0.095	CPSF30:133:x:FIP1:272	#N/A
1	VICVNYLVGFCPEGPSCKFMHPR-VYGTTGTKVK-a18-b8	CPSF30	FIP1	xlink	inter-protein xl	163	120	43	3956.94	792.395	5	-2	4	5	7.64	0.19	0.16	0.42	0.32	0.09	0.07	587	0.52	30.44	0.095	CPSF30:163:x:FIP1:120	#N/A
1	GPRPLEQVTCYKCGEK-VYGTTGTKVK-a12-b8	CPSF30	FIP1	xlink	inter-protein xl	221	120	101	3111.57	778.901	4	0	2	11	9.55	0.19	0.3	0.69	0.06	0.62	0.16	147	0.21	30.34	0.095	CPSF30:221:x:FIP1:120	#N/A
1	MPECYFYSKFGECSNK-KAVNR-a9-b1	CPSF30	WDR33	xlink	inter-protein xl	101	50	51	2770.26	693.572	4	0.6	1	5	9.53	0.22	0.39	0.38	0.33	0.05	0.06	902	0.47	44.63	0	CPSF30:101:x:WDR33:50	#N/A
1	GPRPLEQVTCYKCGEK-NRPGDKMR-a12-b6	CPSF30	WDR33	xlink	inter-protein xl	221	410	189	3031.48	758.878	4	1	2	5	8.33	0.21	0.31	0.39	0.24	0.14	0.07	636	0.74	35.9	0.091	CPSF30:221:x:WDR33:410	#N/A
1	GPRPLEQVTCYKCGEK-KAVNR-a12-b1	CPSF30	WDR33	xlink	inter-protein xl	221	50	171	2645.34	530.076	5	-0.4	5	5	9.6	0.15	0.33	0.59	0.58	0.02	0.08	329	0.5	33.32	0.095	CPSF30:221:x:WDR33:50	#N/A
1	CTKGHLAFLSGQ-KTIDYNPSVIK-a3-b1	CPSF30	WDR33	xlink	inter-protein xl	234	55	179	2732.42	684.112	4	-1.1	1	12	9.26	0.2	0.24	0.38	0.24	0.14	0.07	432	0.2	32.55	0.095	CPSF30:234:x:WDR33:55	#N/A
1	TVVCKHWLR-KAVNRK-a5-b1	CPSF30	WDR33	xlink	inter-protein xl	69	50	19	2050.16	411.04	5	-1.2	2	4	8.82	0.16	0.5	0.78	0.78	0.01	0.12	118	0	32.02	0.095	CPSF30:69:x:WDR33:50	#N/A
1	GFCKHGPLCR-KAVNRK-a4-b1	CPSF30	WDR33	xlink	inter-protein xl	133	50	83	2083.09	417.626	5	-1.3	1	6	9.41	0.12	0.41	0.55	0.5	0.05	0.08	175	0	31.9	0.095	CPSF30:133:x:WDR33:50	#N/A
1	GPRPLEQVTCYKCGEK-TSTNKVK-a12-b5	CPSF30	WDR33	xlink	inter-protein xl	221	117	104	2835.43	709.865	4	1.6	1	7	9.15	0.29	0.27	0.42	0.29	0.13	0.08	345	0.41	31.77	0.095	CPSF30:221:x:WDR33:117	#N/A
1	CTKGHLAFLSGQ-TSTNKVK-a3-b5	CPSF30	WDR33	xlink	inter-protein xl	234	117	117	2232.15	559.045	4	-3.4	1	9	8.59	0.14	0.3	0.26	0.13	0.12	0.05	340	0.46	30.35	0.095	CPSF30:234:x:WDR33:117	#N/A
1	FGECSNKECPFLHIDPESK-KAVNR-a7-b1	CPSF30	WDR33	xlink	inter-protein xl	108	50	58	3017.43	755.365	4	-2.8	1	6	8.15	0.24	0.28	0.38	0.28	0.1	0.08	371	0	30.27	0.095	CPSF30:108:x:WDR33:50	#N/A
1	YQEESKTLSLVSR-TVVCKHWLR-a6-b5	CPSF160	CPSF30	xlink	inter-protein xl	1241	69	1172	2874.5	575.908	5	-1.3	5	9	9.73	0.15	0.39	0.37	0.31	0.06	0.06	374	0.54	35.49	0.095	CPSF30:69:x:CPSF160:1241	#N/A
1	KAEGGGAEEGAGAR-TGNSEKETALPSTK-a1-b6	CPSF160	FIP1	xlink	inter-protein xl	912	231	681	2858.39	715.605	4	-0.3	2	13	10.65	0.29	0.38	0.56	0.37	0.19	0.1	1163	0	51.98	0	CPSF160:912:x:FIP1:231	#N/A
1	KKAEGGGAEEGAGAR-KANSSVGK-a2-b1	CPSF160	FIP1	xlink	inter-protein xl	912	272	640	2314.18	579.554	4	-1.2	1	7	9.29	0.24	0.39	0.39	0.3	0.09	0.07	616	0	39.11	0.091	CPSF160:912:x:FIP1:272	#N/A
1	KAEGGGAEEGAGAR-VYGTTGTKVK-a1-b8	CPSF160	FIP1	xlink	inter-protein xl	912	120	792	2449.24	613.318	4	-0.9	2	11	10.26	0.31	0.33	0.53	0.33	0.19	0.09	436	0.51	37.1	0.091	CPSF160:912:x:FIP1:120	#N/A
1	YQEESKTLSLVSR-FNLFKVQQGR-a6-b5	CPSF160	FIP1	xlink	inter-protein xl	1241	220	1021	2912.54	729.143	4	-0.3	1	10	9.45	0.17	0.23	0.36	0.21	0.15	0.07	644	0.59	36.38	0.091	CPSF160:1241:x:FIP1:220	#N/A
1	LALHKPPLHHQSK-KANSSVGK-a5-b1	CPSF160	FIP1	xlink	inter-protein xl	686	272	414	2432.37	487.481	5	0.2	2	12	10.51	0.18	0.33	0.28	0.05	0.23	0.06	252	0.59	33.54	0.095	CPSF160:686:x:FIP1:272	#N/A
1	YQEESKTLSLVSR-KANSSVGK-a6-b1	CPSF160	FIP1	xlink	inter-protein xl	1241	272	969	2466.3	617.583	4	0.9	2	4	8.25	0.14	0.4	0.37	0.33	0.04	0.06	400	0.45	33.06	0.095	CPSF160:1241:x:FIP1:272	#N/A
1	KKAEGGGAEEGAGAR-XRKAVNR-a2-b3	CPSF160	WDR33	xlink	inter-protein xl	912	50	862	2414.24	483.856	5	-2.2	4	7	10.32	0.2	0.38	0.38	0.32	0.06	0.06	787	0.94	43.83	0.091	CPSF160:912:x:WDR33:50	#N/A
1	MTGEEKEFETIER-KAVNR-a6-b1	CPSF160	WDR33	xlink	inter-protein xl	1055	50	1005	2322.15	581.544	4	-2.8	1	3	8.75	0.26	0.4	0.36	0.32	0.03	0.05	781	0.46	41.06	0.091	CPSF160:1055:x:WDR33:50	#N/A
1	MTGEEKEFETIERDER-KTIDYNPSVIK-a6-b1	CPSF160	WDR33	xlink	inter-protein xl	1055	55	1000	3412.68	683.543	5	1.3	9	16	11.01	0.2	0.3	0.52	0.21	0.3	0.1	557	0.2	39.97	0.091	CPSF160:1055:x:WDR33:55	#N/A
1	MTGEEKEFETIER-NRPGDKXR-a6-b6	CPSF160	WDR33	xlink	inter-protein xl	1055	410	645	2724.29	682.079	4	0.3	4	5	8.36	0.23	0.28	0.46	0.43	0.03	0.07	676	0.7	36.18	0.091	CPSF160:1055:x:WDR33:410	#N/A
1	EAADKEEPPSKK-NRPGDKMR-a11-b6	CPSF160	WDR33	xlink	inter-protein xl	420	410	10	2438.22	610.564	4	0.2	4	8	9.89	0.36	0.31	0.49	0.43	0.06	0.08	243	0.38	32.41	0.095	CPSF160:420:x:WDR33:410	#N/A
1	LALHKPPLHHQSK-KTIDYNPSVIK-a5-b1	CPSF160	WDR33	xlink	inter-protein xl	686	55	631	2919.64	584.935	5	0.8	1	6	8.25	0.17	0.33	0.39	0.01	0.38	0.08	420	0.29	32.19	0.095	CPSF160:686:x:WDR33:55	#N/A
1	LALHKPPLHHQSK-DHLCKLFDIR-a5-b5	CPSF160	WDR33	xlink	inter-protein xl	686	313	373	2958.61	592.729	5	1.4	1	10	9.5	0.22	0.26	0.46	0.1	0.37	0.09	309	0.49	31.52	0.095	CPSF160:686:x:WDR33:313	#N/A
1	TGNSEKETALPSTK-GFCKHGPLCR-a6-b4	FIP1	CPSF30	xlink	inter-protein xl	231	133	98	2830.37	567.081	5	-2.7	4	11	10.57	0.21	0.44	0.43	0.29	0.13	0.07	644	0.72	43.17	0.091	CPSF30:133:x:FIP1:231	#N/A
1	FNLFKVQQGR-IKDCPWYDR-a5-b2	FIP1	CPSF30	xlink	inter-protein xl	220	122	98	2625.32	657.336	4	-0.6	1	11	10.52	0.2	0.45	0.41	0.29	0.13	0.07	390	0.39	38.72	0.091	CPSF30:122:x:FIP1:220	#N/A
1	FNLFKVQQGR-GFCKHGPLCR-a5-b4	FIP1	CPSF30	xlink	inter-protein xl	220	133	87	2604.32	521.871	5	-1.2	2	10	9.66	0.18	0.45	0.46	0.41	0.06	0.08	473	0.42	38.68	0.091	CPSF30:133:x:FIP1:220	#N/A
1	TGAPQYGSYGTAPVNLNIKTGGR-AACGKGGMCPFR-a19-b5	FIP1	CPSF30	xlink	inter-protein xl	108	51	57	3769.82	943.462	4	1	2	8	8.35	0.29	0.24	0.49	0.43	0.07	0.08	642	0.31	34.81	0.095	CPSF30:51:x:FIP1:108	#N/A
1	KANSSVGKWQDR-GFCKHGPLCR-a8-b4	FIP1	CPSF30	xlink	inter-protein xl	279	133	146	2743.33	549.675	5	-3.6	3	8	9.25	0.29	0.34	0.56	0.51	0.05	0.09	347	0.78	33.75	0.095	CPSF30:133:x:FIP1:279	#N/A
1	KPGADLSDYFNYGFNEDTWK-GFCKHGPLCR-a1-b4	FIP1	CPSF30	xlink	inter-protein xl	152	133	19	3734.7	934.681	4	0.6	4	4	7.62	0.23	0.28	0.55	0.53	0.02	0.08	550	0	32.45	0.095	CPSF30:133:x:FIP1:152	#N/A
1	TGNSEKETALPSTK-IKDCPWYDR-a6-b2	FIP1	CPSF30	xlink	inter-protein xl	231	122	109	2851.37	713.849	4	-1.5	1	7	7.37	0.15	0.21	0.31	0.2	0.11	0.06	688	0	32.42	0.095	CPSF30:122:x:FIP1:231	#N/A
1	VYGTTGTKVK-TVVCKHWLR-a8-b5	FIP1	CPSF30	xlink	inter-protein xl	120	69	51	2388.29	478.667	5	-2.1	1	10	9.83	0.23	0.22	0.48	0.2	0.28	0.09	295	0.54	31.03	0.095	CPSF30:69:x:FIP1:120	#N/A
1	KPGADLSDYFNYGFNEDTWK-TVVCKHWLR-a1-b5	FIP1	CPSF30	xlink	inter-protein xl	152	69	83	3701.77	741.361	5	1.8	4	4	7.96	0.17	0.24	0.43	0.42	0.01	0.06	489	0.37	30.83	0.095	CPSF30:69:x:FIP1:152	#N/A
1	TGNSEKETALPSTK-TVVCKHWLR-a6-b5	FIP1	CPSF30	xlink	inter-protein xl	231	69	162	2797.45	700.369	4	1.1	1	4	7.59	0.22	0.24	0.35	0.32	0.03	0.05	524	0.26	30.69	0.095	CPSF30:69:x:FIP1:231	#N/A
1	FNLFKVQQGR-TVVCKHWLR-a5-b5	FIP1	CPSF30	xlink	inter-protein xl	220	69	151	2571.39	515.285	5	-0.8	1	7	8.07	0.14	0.44	0.46	0.2	0.26	0.08	214	0.57	30.65	0.095	CPSF30:69:x:FIP1:220	#N/A
1	TGNSEKETALPSTK-YQEESKTLSLVSR-a6-b6	FIP1	CPSF160	xlink	inter-protein xl	231	1241	1010	3138.6	785.658	4	2.2	2	12	8.91	0.14	0.27	0.36	0.16	0.2	0.07	747	0.57	37.94	0.091	CPSF160:1241:x:FIP1:231	#N/A
1	KANSSVGKWQDR-STEGKAHR-a8-b5	FIP1	CPSF160	xlink	inter-protein xl	279	60	219	2397.21	600.311	4	-1.3	2	8	9.77	0.24	0.29	0.26	0.12	0.14	0.05	259	0.81	31.38	0.095	CPSF160:60:x:FIP1:279	#N/A
1	TGNSEKETALPSTK-STEGKAHR-a6-b5	FIP1	CPSF160	xlink	inter-protein xl	231	60	171	2484.24	622.069	4	-1	1	5	7.78	0.22	0.33	0.23	0.2	0.03	0.04	389	0.85	30.35	0.095	CPSF160:60:x:FIP1:231	#N/A
1	KANSSVGKWQDR-KAVNRK-a8-b1	FIP1	WDR33	xlink	inter-protein xl	279	50	229	2227.22	557.812	4	-1.1	1	9	10.51	0.36	0.4	0.38	0.25	0.13	0.07	543	0.69	40.74	0.091	FIP1:279:x:WDR33:50	#N/A
1	TGNSEKETALPSTK-KAVNRK-a6-b1	FIP1	WDR33	xlink	inter-protein xl	231	50	181	2314.24	579.569	4	-2.1	2	7	9.89	0.21	0.32	0.33	0.3	0.03	0.05	568	0	37.78	0.091	FIP1:231:x:WDR33:50	#N/A
1	FNLFKVQQGR-NLKEELQVFR-a5-b3	FIP1	WDR33	xlink	inter-protein xl	220	321	101	2648.44	663.119	4	-0.3	1	10	9.82	0.15	0.3	0.33	0.13	0.2	0.06	547	0.64	36.74	0.091	FIP1:220:x:WDR33:321	#N/A
1	RPDFAQQQAMQQLTFDGKR-MTGEEKEFETIERDER-a18-b6	WDR33	CPSF160	xlink	inter-protein xl	46	1055	1009	4400.1	881.028	5	4.2	1	7	7.66	0.13	0.12	0.45	0.4	0.04	0.08	742	0.23	32.41	0.095	CPSF160:1055:x:WDR33:46	#N/A
1	NLKEELQVFR-VYGTTGTKVK-a3-b8	WDR33	FIP1	xlink	inter-protein xl	321	120	201	2465.35	617.345	4	-2.1	1	12	10.68	0.27	0.24	0.39	0.11	0.29	0.07	201	0.58	31.3	0.095	FIP1:120:x:WDR33:321	#N/A

## Sheet: Intra
Rank	Id	Protein1	Protein2	Type	XLType	AbsPos1	AbsPos2	deltaAA	Mr	Mz	z	Error_rel.ppm.	nseen	mions	MatchOdds	Xcorrx	Xcorrb	TIC	TicA	TicB	WTIC	intsum	deltaS	ld.Score	FDR	uxID	comment
1	GFCKHGPLCR-IKDCPWYDR-a4-b2	CPSF30	CPSF30	xlink	intra-protein xl	133	122	11	2620.21	874.412	3	-0.8	5	12	10.12	0.26	0.21	0.5	0.25	0.24	0.09	806	0	40.8	0.045	CPSF30:122:x:CPSF30:133	#N/A
1	GPRPLEQVTCYKCGEK-GFCKHGPLCR-a12-b4	CPSF30	CPSF30	xlink	intra-protein xl	221	133	88	3289.57	823.399	4	1	1	13	11.18	0.27	0.25	0.42	0.12	0.3	0.09	627	0.11	40.36	0.045	CPSF30:133:x:CPSF30:221	#N/A
1	AACGKGGMCPFR-GFCKHGPLCR-a5-b4	CPSF30	CPSF30	xlink	intra-protein xl	51	133	82	2679.2	536.849	5	-2.6	2	9	9.91	0.2	0.31	0.44	0.37	0.07	0.08	631	0.77	38.95	0.045	CPSF30:133:x:CPSF30:51	#N/A
1	KGDQCEFLHEYDMTK-TVVCKHWLR-a1-b5	CPSF30	CPSF30	xlink	intra-protein xl	78	69	9	3235.52	809.887	4	-2.2	10	10	10.61	0.2	0.28	0.44	0.21	0.23	0.09	564	0.56	38.74	0.045	CPSF30:69:x:CPSF30:78	#N/A
1	MPECYFYSKFGECSNK-TVVCKHWLR-a9-b5	CPSF30	CPSF30	xlink	intra-protein xl	101	69	32	3381.55	846.394	4	0.1	5	8	9.53	0.25	0.24	0.5	0.36	0.14	0.09	606	0.61	36.65	0.048	CPSF30:101:x:CPSF30:69	#N/A
1	TVVCKHWLR-GLCKK-a5-b4	CPSF30	CPSF30	xlink	intra-protein xl	69	77	8	1940.05	389.017	5	-1.4	4	8	11.5	0.24	0.36	0.7	0.44	0.26	0.13	187	0	36.04	0.058	CPSF30:69:x:CPSF30:77	#N/A
1	GPRPLEQVTCYKCGEK-CTKGHLAFLSGQ-a12-b3	CPSF30	CPSF30	xlink	intra-protein xl	221	234	13	3376.63	1126.55	3	-1.9	8	15	9.77	0.34	0.17	0.37	0.09	0.28	0.07	590	0	35.32	0.067	CPSF30:221:x:CPSF30:234	#N/A
1	MPECYFYSKFGECSNK-IKDCPWYDR-a9-b2	CPSF30	CPSF30	xlink	intra-protein xl	101	122	21	3435.46	859.873	4	-3.2	2	10	9.44	0.23	0.24	0.36	0.16	0.2	0.07	552	0.6	35.14	0.067	CPSF30:101:x:CPSF30:122	#N/A
1	GPRPLEQVTCYKCGEK-TVVCKHWLR-a12-b5	CPSF30	CPSF30	xlink	intra-protein xl	221	69	152	3256.64	815.167	4	1.4	4	12	10.26	0.23	0.27	0.56	0.11	0.46	0.13	367	0.23	34.91	0.067	CPSF30:221:x:CPSF30:69	#N/A
1	GFCKHGPLCR-TVVCKHWLR-a4-b5	CPSF30	CPSF30	xlink	intra-protein xl	133	69	64	2566.29	514.266	5	1.8	3	10	10.04	0.19	0.45	0.74	0.08	0.66	0.14	131	0.78	34.08	0.07	CPSF30:133:x:CPSF30:69	#N/A
1	GPRPLEQVTCYKCGEK-IKDCPWYDR-a12-b2	CPSF30	CPSF30	xlink	intra-protein xl	221	122	99	3310.56	828.648	4	1.4	2	14	9.8	0.2	0.31	0.39	0.1	0.29	0.09	327	0.07	33.44	0.07	CPSF30:122:x:CPSF30:221	#N/A
1	MPECYFYSKFGECSNK-GFCKHGPLCR-a9-b4	CPSF30	CPSF30	xlink	intra-protein xl	101	133	32	3414.48	683.903	5	0.1	2	4	7.34	0.18	0.28	0.49	0.47	0.02	0.08	453	0.94	30.04	0.079	CPSF30:101:x:CPSF30:133	#N/A
1	QGELPLVKEVLLVALGSR-KAEGGGAEEGAGAR-a8-b1	CPSF160	CPSF160	xlink	intra-protein xl	847	912	65	3316.79	830.206	4	-1.7	21	16	9.6	0.15	0.5	0.51	0.29	0.21	0.09	1164	0.45	52.2	0	CPSF160:847:x:CPSF160:912	#N/A
1	KKAEGGGAEEGAGAR-KSVVWENK-a2-b1	CPSF160	CPSF160	xlink	intra-protein xl	912	1326	414	2513.29	629.329	4	-0.4	4	18	11.5	0.28	0.51	0.47	0.17	0.3	0.1	752	0.19	49.05	0	CPSF160:1326:x:CPSF160:912	#N/A
1	KAEGGGAEEGAGAR-GATEGLSKK-a1-b8	CPSF160	CPSF160	xlink	intra-protein xl	912	1325	413	2286.15	572.546	4	2.8	4	10	11.04	0.3	0.5	0.54	0.5	0.04	0.08	755	0.86	47.8	0	CPSF160:1325:x:CPSF160:912	#N/A
1	KKAEGGGAEEGAGAR-EKKPKPSK-a2-b3	CPSF160	CPSF160	xlink	intra-protein xl	912	905	7	2465.33	617.34	4	1.9	11	10	10.12	0.36	0.46	0.5	0.44	0.05	0.08	810	0	46.27	0	CPSF160:905:x:CPSF160:912	#N/A
1	YTEKLQEPPASAVR-DAEALTKNDR-a4-b7	CPSF160	CPSF160	xlink	intra-protein xl	399	52	347	2857.44	715.369	4	-0.7	4	16	11.29	0.3	0.34	0.61	0.28	0.33	0.12	730	0.57	44.78	0	CPSF160:399:x:CPSF160:52	#N/A
1	LNRDAEALTKNDR-LGNSLLLKYTEK-a10-b8	CPSF160	CPSF160	xlink	intra-protein xl	52	395	343	3030.63	607.134	5	-1.5	5	15	10.9	0.2	0.36	0.42	0.23	0.19	0.08	748	0.27	44.07	0	CPSF160:395:x:CPSF160:52	#N/A
1	EKKPKPSK-KSVVWENK-a3-b1	CPSF160	CPSF160	xlink	intra-protein xl	905	1326	421	2067.17	517.801	4	0.1	9	8	10.14	0.24	0.45	0.38	0.04	0.33	0.07	646	0.27	42.78	0	CPSF160:1326:x:CPSF160:905	#N/A
1	KAEGGGAEEGAGAR-KPKPSKK-a1-b6	CPSF160	CPSF160	xlink	intra-protein xl	912	910	2	2208.19	553.055	4	1.2	27	5	9.35	0.24	0.48	0.68	0.66	0.02	0.09	644	0.94	42.04	0	CPSF160:910:x:CPSF160:912	#N/A
1	DAEALTKNDR-STEGKAHR-a7-b5	CPSF160	CPSF160	xlink	intra-protein xl	52	60	8	2154.07	719.03	3	-0.6	6	9	10.87	0.59	0.4	0.57	0.5	0.07	0.1	477	0.2	41.28	0.045	CPSF160:52:x:CPSF160:60	#N/A
1	KRVDATAGWSAAGK-EAADKEEPPSKK-a1-b5	CPSF160	CPSF160	xlink	intra-protein xl	422	414	8	2882.48	721.627	4	-0.5	16	14	10.02	0.18	0.28	0.41	0.11	0.3	0.08	775	0.24	41.03	0.045	CPSF160:414:x:CPSF160:422	#N/A
1	KAEGGGAEEGAGAR-SELAKK-a1-b5	CPSF160	CPSF160	xlink	intra-protein xl	912	1420	508	2071.05	691.359	3	-0.3	2	9	11.04	0.27	0.36	0.46	0.39	0.06	0.07	547	0.38	40.9	0.045	CPSF160:1420:x:CPSF160:912	#N/A
1	KKAEGGGAEEGAGAR-KPKPSK-a2-b3	CPSF160	CPSF160	xlink	intra-protein xl	912	907	5	2208.18	553.054	4	-0.4	11	7	10.51	0.26	0.31	0.46	0.34	0.12	0.08	590	0.94	39.7	0.045	CPSF160:907:x:CPSF160:912	#N/A
1	LALHKPPLHHQSK-KVPHNINFR-a5-b1	CPSF160	CPSF160	xlink	intra-protein xl	686	894	208	2766.55	554.318	5	-1.7	11	9	9.66	0.19	0.41	0.4	0.21	0.18	0.07	584	0.3	39.61	0.045	CPSF160:686:x:CPSF160:894	#N/A
1	LNRDAEALTKNDR-KIPLR-a10-b1	CPSF160	CPSF160	xlink	intra-protein xl	52	1015	963	2278.27	456.663	5	-1	3	6	9.9	0.2	0.51	0.39	0.26	0.13	0.07	410	0.79	39.28	0.045	CPSF160:1015:x:CPSF160:52	#N/A
1	LALHKPPLHHQSKVITLCLYR-KAEGGGAEEGAGAR-a13-b1	CPSF160	CPSF160	xlink	intra-protein xl	694	912	218	3920.09	785.025	5	0.5	3	12	8.89	0.21	0.28	0.42	0.06	0.36	0.09	770	0.82	39.15	0.045	CPSF160:694:x:CPSF160:912	#N/A
1	GATEGLSKK-KPKPSKK-a8-b6	CPSF160	CPSF160	xlink	intra-protein xl	1325	910	415	1839.09	614.037	3	2.1	13	11	10.66	0.38	0.22	0.48	0.25	0.23	0.09	623	0.87	38.92	0.045	CPSF160:1325:x:CPSF160:910	#N/A
1	KKAEGGGAEEGAGAR-GATEGLSKK-a1-b8	CPSF160	CPSF160	xlink	intra-protein xl	911	1325	414	2414.24	805.754	3	-0.5	2	14	9.04	0.46	0.24	0.46	0.32	0.14	0.08	752	0	38.72	0.045	CPSF160:1325:x:CPSF160:911	#N/A
1	YTEKLQEPPASAVR-EAADKEEPPSK-a4-b5	CPSF160	CPSF160	xlink	intra-protein xl	399	414	15	2925.46	732.374	4	0.7	6	11	10.65	0.24	0.25	0.54	0.4	0.14	0.09	562	0.2	38.22	0.048	CPSF160:399:x:CPSF160:414	#N/A
1	KAEGGGAEEGAGAR-LALHKPPLHHQSK-a1-b5	CPSF160	CPSF160	xlink	intra-protein xl	912	686	226	2901.53	581.313	5	1.9	4	7	8.51	0.19	0.31	0.56	0.55	0.02	0.1	728	0.4	38.13	0.048	CPSF160:686:x:CPSF160:912	#N/A
1	EAADKEEPPSK-DAEALTKNDR-a5-b7	CPSF160	CPSF160	xlink	intra-protein xl	414	52	362	2469.19	618.304	4	-0.3	1	11	10.13	0.19	0.28	0.33	0.11	0.23	0.06	600	0	37.95	0.048	CPSF160:414:x:CPSF160:52	#N/A
1	LGNSLLLKYTEK-STEGKAHR-a8-b5	CPSF160	CPSF160	xlink	intra-protein xl	395	60	335	2400.31	601.084	4	1.8	8	7	9.85	0.23	0.3	0.47	0.4	0.06	0.08	580	0.81	37.77	0.048	CPSF160:395:x:CPSF160:60	#N/A
1	LALHKPPLHHQSK-LVFLVKNFPVGQR-a5-b6	CPSF160	CPSF160	xlink	intra-protein xl	686	809	123	3158.83	632.774	5	3	21	8	9.1	0.16	0.58	0.38	0.03	0.35	0.07	324	0.37	37.38	0.048	CPSF160:686:x:CPSF160:809	#N/A
1	QGELPLVKEVLLVALGSR-EKKPKPSK-a8-b3	CPSF160	CPSF160	xlink	intra-protein xl	847	905	58	2998.79	750.705	4	2.5	7	4	7.94	0.18	0.38	0.29	0.27	0.02	0.04	696	0.21	37.27	0.048	CPSF160:847:x:CPSF160:905	#N/A
1	EKKPKPSKK-KSVVWENK-a5-b1	CPSF160	CPSF160	xlink	intra-protein xl	907	1326	419	2195.27	549.825	4	0	9	8	9.28	0.28	0.43	0.32	0.07	0.25	0.06	444	0.44	36.95	0.048	CPSF160:1326:x:CPSF160:907	#N/A
1	LALHKPPLHHQSK-STEGKAHR-a5-b5	CPSF160	CPSF160	xlink	intra-protein xl	686	60	626	2527.38	506.484	5	0.9	2	7	9.89	0.2	0.36	0.38	0.24	0.14	0.07	434	0.77	36.43	0.048	CPSF160:60:x:CPSF160:686	#N/A
1	YTEKLQEPPASAVR-STEGKAHR-a4-b5	CPSF160	CPSF160	xlink	intra-protein xl	399	60	339	2610.34	653.592	4	-1	15	5	8.87	0.22	0.32	0.46	0.44	0.02	0.07	554	0.25	35.8	0.058	CPSF160:399:x:CPSF160:60	#N/A
1	EKKPKPSKK-KSVVWENK-a8-b1	CPSF160	CPSF160	xlink	intra-protein xl	910	1326	416	2195.27	549.825	4	-0.3	7	10	10.1	0.3	0.42	0.27	0.08	0.19	0.05	310	0.84	35.79	0.058	CPSF160:1326:x:CPSF160:910	#N/A
1	EAADKEEPPSK-STEGKAHR-a5-b5	CPSF160	CPSF160	xlink	intra-protein xl	414	60	354	2222.08	556.528	4	-1	7	7	9.74	0.26	0.39	0.25	0.21	0.04	0.04	363	0	35.27	0.067	CPSF160:414:x:CPSF160:60	#N/A
1	YTEKLQEPPASAVR-LALHKPPLHHQSK-a4-b5	CPSF160	CPSF160	xlink	intra-protein xl	399	686	287	3230.75	647.159	5	-0.6	1	8	8.64	0.19	0.28	0.43	0.4	0.03	0.08	586	0.49	35.06	0.067	CPSF160:399:x:CPSF160:686	#N/A
1	KRVDATAGWSAAGK-EAADKEEPPSKK-a1-b11	CPSF160	CPSF160	xlink	intra-protein xl	422	420	2	2882.48	577.504	5	1.8	13	7	8.41	0.18	0.34	0.33	0.27	0.06	0.06	549	0	34.94	0.067	CPSF160:420:x:CPSF160:422	#N/A
1	EEEDNPKGEGTEQEPSTTPEADDDGRR-DAEALTKNDR-a7-b7	CPSF160	CPSF160	xlink	intra-protein xl	551	52	499	4256.86	852.381	5	-1.2	3	12	10.56	0.2	0.31	0.31	0.11	0.2	0.08	335	0	34.93	0.067	CPSF160:52:x:CPSF160:551	#N/A
1	EAADKEEPPSKK-DAEALTKNDR-a11-b7	CPSF160	CPSF160	xlink	intra-protein xl	420	52	368	2597.29	650.329	4	1.6	9	10	9.58	0.2	0.32	0.59	0.11	0.48	0.11	387	0.58	34.73	0.067	CPSF160:420:x:CPSF160:52	#N/A
1	MTGEEKEFETIERDER-LALHKPPLHHQSK-a6-b5	CPSF160	CPSF160	xlink	intra-protein xl	1055	686	369	3640.84	729.175	5	1.6	2	9	8.98	0.18	0.18	0.38	0.27	0.11	0.07	639	0.52	34.46	0.067	CPSF160:1055:x:CPSF160:686	#N/A
1	QGELPLVKEVLLVALGSR-KPKPSKK-a8-b6	CPSF160	CPSF160	xlink	intra-protein xl	847	910	63	2869.75	718.445	4	3.5	4	6	9.39	0.2	0.31	0.27	0.25	0.03	0.04	434	0.9	33.93	0.07	CPSF160:847:x:CPSF160:910	#N/A
1	EKKPKPSK-KSVVWENK-a2-b1	CPSF160	CPSF160	xlink	intra-protein xl	904	1326	422	2067.17	414.442	5	-0.2	4	4	8.42	0.18	0.44	0.45	0.01	0.44	0.08	349	0	33.78	0.07	CPSF160:1326:x:CPSF160:904	#N/A
1	LALHKPPLHHQSK-LGNSLLLKYTEK-a5-b8	CPSF160	CPSF160	xlink	intra-protein xl	686	395	291	3020.72	605.152	5	1.8	2	9	9.11	0.21	0.23	0.36	0.04	0.32	0.07	531	0	33.73	0.07	CPSF160:395:x:CPSF160:686	#N/A
1	GATEGLSKK-KPKPSK-a8-b1	CPSF160	CPSF160	xlink	intra-protein xl	1325	905	420	1710.99	571.337	3	-0.8	1	8	9.34	0.36	0.24	0.39	0.28	0.11	0.07	464	0.91	33.61	0.07	CPSF160:1325:x:CPSF160:905	#N/A
1	QGELPLVKEVLLVALGSR-KKAEGGGAEEGAGAR-a8-b1	CPSF160	CPSF160	xlink	intra-protein xl	847	911	64	3444.9	689.989	5	3	1	10	8.33	0.13	0.29	0.34	0.27	0.07	0.06	485	0.49	32.35	0.07	CPSF160:847:x:CPSF160:911	#N/A
1	QGELPLVKEVLLVALGSR-EKKPKPSKK-a8-b5	CPSF160	CPSF160	xlink	intra-protein xl	847	907	60	3126.88	626.383	5	1	8	4	7.84	0.21	0.34	0.43	0.42	0.01	0.06	456	0.22	32.24	0.07	CPSF160:847:x:CPSF160:907	#N/A
1	MTGEEKEFETIERDER-KIPLR-a6-b1	CPSF160	CPSF160	xlink	intra-protein xl	1055	1015	40	2761.4	691.358	4	1.3	4	4	8.29	0.16	0.24	0.39	0.34	0.05	0.06	525	0.38	32.01	0.07	CPSF160:1015:x:CPSF160:1055	#N/A
1	AFHFDKAAASVLTTSMVTMEPGYLFLGSR-YTEKLQEPPASAVR-a6-b4	CPSF160	CPSF160	xlink	intra-protein xl	364	399	35	4872.46	975.499	5	1.5	6	9	9.44	0.12	0.2	0.4	0.28	0.11	0.07	445	0.36	31.99	0.07	CPSF160:364:x:CPSF160:399	#N/A
1	MTGEEKEFETIERDER-STEGKAHR-a6-b5	CPSF160	CPSF160	xlink	intra-protein xl	1055	60	995	3020.41	605.09	5	-1.5	7	5	7.69	0.16	0.14	0.41	0.35	0.06	0.06	682	0.92	31.73	0.07	CPSF160:1055:x:CPSF160:60	#N/A
1	LGNSLLLKYTEK-EAADKEEPPSK-a8-b5	CPSF160	CPSF160	xlink	intra-protein xl	395	414	19	2715.42	679.862	4	-1.6	1	8	8.12	0.18	0.27	0.24	0.11	0.12	0.04	472	0.49	31.28	0.07	CPSF160:395:x:CPSF160:414	#N/A
1	LALHKPPLHHQSK-DAEALTKNDR-a5-b7	CPSF160	CPSF160	xlink	intra-protein xl	686	52	634	2774.48	555.904	5	-1.2	2	10	9.45	0.22	0.19	0.36	0.11	0.25	0.07	392	0.31	31.26	0.07	CPSF160:52:x:CPSF160:686	#N/A
1	GATEGLSKK-KPKPSKK-a8-b3	CPSF160	CPSF160	xlink	intra-protein xl	1325	907	418	1839.08	460.779	4	0.8	9	9	10.67	0.29	0.16	0.43	0.26	0.17	0.08	264	0	30.81	0.073	CPSF160:1325:x:CPSF160:907	#N/A
1	KAEGGGAEEGAGAR-EKKPKPSKK-a1-b2	CPSF160	CPSF160	xlink	intra-protein xl	912	904	8	2465.32	494.073	5	0.4	1	4	7.67	0.14	0.2	0.57	0.55	0.02	0.09	529	0.93	30.42	0.073	CPSF160:904:x:CPSF160:912	#N/A
1	TGNSEKETALPSTK-FNLFKVQQGR-a6-b5	FIP1	FIP1	xlink	intra-protein xl	231	220	11	2835.47	946.163	3	-3.5	10	15	11.14	0.48	0.3	0.53	0.25	0.28	0.1	890	0	46.82	0	FIP1:220:x:FIP1:231	#N/A
1	FNLFKVQQGR-FNLFKVQQGR-a5-b5	FIP1	FIP1	xlink	intra-protein xl	220	220	0	2609.42	653.363	4	-0.3	2	17	11.51	0.21	0.49	0.54	0.27	0.27	0.1	491	0.46	43.81	0	FIP1:220:x:FIP1:220	#N/A
1	TGNSEKETALPSTKAEFTSPPSLFK-FNLFKVQQGR-a14-b5	FIP1	FIP1	xlink	intra-protein xl	239	220	19	4040.11	1011.03	4	3.9	7	9	9.39	0.21	0.23	0.39	0.28	0.1	0.07	1028	0.63	43.32	0	FIP1:220:x:FIP1:239	#N/A
1	FNLFKVQQGR-KANSSVGK-a5-b1	FIP1	FIP1	xlink	intra-protein xl	220	272	52	2163.17	722.066	3	-3.2	4	9	9.54	0.31	0.44	0.61	0.57	0.04	0.1	625	0.43	41.55	0	FIP1:220:x:FIP1:272	#N/A
1	FNLFKVQQGR-AYCEKQKR-a5-b5	FIP1	FIP1	xlink	intra-protein xl	220	176	44	2455.28	819.436	3	1.9	7	8	9.81	0.39	0.36	0.4	0.33	0.08	0.07	689	0.39	41.22	0.045	FIP1:176:x:FIP1:220	#N/A
1	KANSSVGKWQDR-FNLFKVQQGR-a8-b5	FIP1	FIP1	xlink	intra-protein xl	279	220	59	2748.44	550.697	5	-0.9	3	18	11.51	0.21	0.38	0.48	0.28	0.2	0.09	444	0.76	40.4	0.045	FIP1:220:x:FIP1:279	#N/A
1	TGNSEKETALPSTK-VYGTTGTKVK-a6-b8	FIP1	FIP1	xlink	intra-protein xl	231	120	111	2652.38	885.136	3	-0.8	4	16	11.37	0.37	0.24	0.5	0.22	0.28	0.1	565	0	39.82	0.045	FIP1:120:x:FIP1:231	#N/A
1	KPGADLSDYFNYGFNEDTWK-TGNSEKETALPSTK-a1-b6	FIP1	FIP1	xlink	intra-protein xl	152	231	79	3965.86	992.472	4	2.6	4	9	8.59	0.18	0.13	0.38	0.23	0.15	0.07	1040	0	39.77	0.045	FIP1:152:x:FIP1:231	#N/A
1	FNLFKVQQGR-VYGTTGTKVK-a5-b8	FIP1	FIP1	xlink	intra-protein xl	220	120	100	2426.33	607.59	4	-2.1	4	14	11.5	0.29	0.52	0.64	0.31	0.33	0.12	177	0.33	39.23	0.045	FIP1:120:x:FIP1:220	#N/A
1	TGNSEKETALPSTK-AYCEKQKR-a6-b5	FIP1	FIP1	xlink	intra-protein xl	231	176	55	2681.33	894.785	3	-0.6	6	12	11.41	0.37	0.31	0.44	0.27	0.17	0.08	436	0.31	39	0.045	FIP1:176:x:FIP1:231	#N/A
1	TGNSEKETALPSTK-KANSSVGK-a6-b1	FIP1	FIP1	xlink	intra-protein xl	231	272	41	2389.23	598.316	4	0.3	3	7	9.14	0.18	0.3	0.29	0.25	0.03	0.04	715	0.36	38.26	0.048	FIP1:231:x:FIP1:272	#N/A
1	KANSSVGKWQDR-KANSSVGK-a8-b1	FIP1	FIP1	xlink	intra-protein xl	279	272	7	2302.2	576.559	4	0.9	2	12	11.12	0.28	0.45	0.3	0.13	0.17	0.06	249	0.82	37.35	0.048	FIP1:272:x:FIP1:279	#N/A
1	FNLFKVQQGR-AYCEKQKR-a5-b7	FIP1	FIP1	xlink	intra-protein xl	220	178	42	2455.29	614.83	4	4.3	1	6	8.51	0.29	0.35	0.51	0.45	0.07	0.09	570	0.36	36.3	0.048	FIP1:178:x:FIP1:220	#N/A
1	VYGTTGTKVK-AYCEKQK-a8-b5	FIP1	FIP1	xlink	intra-protein xl	120	176	56	2116.09	706.37	3	-1	4	11	11.46	0.48	0.36	0.53	0.46	0.07	0.09	183	0.25	35.86	0.058	FIP1:120:x:FIP1:176	#N/A
1	AYCEKQKR-AYCEKQK-a5-b5	FIP1	FIP1	xlink	intra-protein xl	176	176	0	2145.03	537.266	4	-0.6	6	11	11.5	0.26	0.38	0.7	0.35	0.35	0.13	139	0	35.55	0.067	FIP1:176:x:FIP1:176	#N/A
1	TGNSEKETALPSTK-ANSSVGKWQDR-a6-b7	FIP1	FIP1	xlink	intra-protein xl	231	279	48	2846.4	712.607	4	-2.9	2	12	9.55	0.12	0.32	0.49	0.16	0.34	0.1	433	0.19	34.88	0.067	FIP1:231:x:FIP1:279	#N/A
1	TGAPQYGSYGTAPVNLNIKTGGR-VYGTTGTKVK-a19-b8	FIP1	FIP1	xlink	intra-protein xl	108	120	12	3511.83	878.966	4	0.7	2	8	9.04	0.28	0.25	0.53	0.36	0.17	0.1	537	0.15	34.87	0.067	FIP1:108:x:FIP1:120	#N/A
1	KPGADLSDYFNYGFNEDTWK-FNLFKVQQGR-a1-b5	FIP1	FIP1	xlink	intra-protein xl	152	220	68	3739.8	935.957	4	0.4	3	7	9.15	0.21	0.22	0.38	0.32	0.06	0.06	593	0.22	34.78	0.067	FIP1:152:x:FIP1:220	#N/A
1	KPGADLSDYFNYGFNEDTWK-KANSSVGK-a1-b1	FIP1	FIP1	xlink	intra-protein xl	152	272	120	3293.55	824.396	4	0.2	2	6	8.89	0.18	0.21	0.34	0.3	0.03	0.05	624	0	34.31	0.067	FIP1:152:x:FIP1:272	#N/A
1	TGAPQYGSYGTAPVNLNIKTGGR-FNLFKVQQGR-a19-b5	FIP1	FIP1	xlink	intra-protein xl	108	220	112	3694.92	924.738	4	0	4	8	8.91	0.34	0.25	0.5	0.43	0.07	0.08	493	0.74	33.56	0.07	FIP1:108:x:FIP1:220	#N/A
1	VYGTTGTKVK-KANSSVGK-a8-b1	FIP1	FIP1	xlink	intra-protein xl	120	272	152	1980.09	496.031	4	0.9	4	10	10.63	0.23	0.36	0.61	0.58	0.03	0.1	164	0	33.56	0.07	FIP1:120:x:FIP1:272	#N/A
1	TGAPQYGSYGTAPVNLNIKTGGR-TGNSEKETALPSTK-a19-b6	FIP1	FIP1	xlink	intra-protein xl	108	231	123	3920.96	981.248	4	-3.9	3	11	9.81	0.26	0.33	0.55	0.44	0.11	0.09	286	0.13	33.25	0.07	FIP1:108:x:FIP1:231	#N/A
1	VYGTTGTKVK-VYGTTGTKVK-a8-b8	FIP1	FIP1	xlink	intra-protein xl	120	120	0	2243.24	748.755	3	0	3	17	11.5	0.34	0.23	0.52	0.26	0.26	0.09	178	0.23	32.91	0.07	FIP1:120:x:FIP1:120	#N/A
1	AEFTSPPSLFKTGLPPSR-FNLFKVQQGR-a11-b5	FIP1	FIP1	xlink	intra-protein xl	250	220	30	3304.76	827.198	4	-0.1	48	8	9.49	0.13	0.31	0.54	0.5	0.04	0.08	242	0.73	31.07	0.07	FIP1:220:x:FIP1:250	#N/A
1	AEFTSPPSLFKTGLPPSR-KANSSVGK-a11-b1	FIP1	FIP1	xlink	intra-protein xl	250	272	22	2858.52	715.638	4	0.8	26	5	8.58	0.18	0.36	0.48	0.46	0.02	0.07	281	0.21	30.83	0.073	FIP1:250:x:FIP1:272	#N/A
1	TGQSLATLHAHKNTVMEVK-DHLCKLFDIR-a12-b5	WDR33	WDR33	xlink	intra-protein xl	288	313	25	3517.81	587.31	6	-0.8	10	11	10.35	0.22	0.37	0.51	0.26	0.25	0.1	820	0.66	44.96	0	WDR33:288:x:WDR33:313	#N/A
1	DHLCKLFDIR-NLKEELQVFR-a5-b3	WDR33	WDR33	xlink	intra-protein xl	313	321	8	2728.44	683.117	4	-0.4	3	14	11.34	0.27	0.46	0.58	0.15	0.43	0.11	538	0.55	43.94	0	WDR33:313:x:WDR33:321	#N/A
1	RPDFAQQQAMQQLTFDGKR-KAVNRK-a18-b1	WDR33	WDR33	xlink	intra-protein xl	46	50	4	3116.63	780.165	4	-0.3	9	4	8.11	0.2	0.27	0.42	0.39	0.03	0.06	1113	0.15	43.1	0	WDR33:46:x:WDR33:50	#N/A
1	CVDWHPTKGLVVSGSK-NLKEELQVFR-a8-b3	WDR33	WDR33	xlink	intra-protein xl	256	321	65	3181.67	637.342	5	3.9	11	15	10.81	0.19	0.3	0.46	0.08	0.37	0.1	579	0.76	39.97	0.045	WDR33:256:x:WDR33:321	#N/A
1	TGQSLATLHAHKNTVMEVK-NLKEELQVFR-a12-b3	WDR33	WDR33	xlink	intra-protein xl	288	321	33	3476.84	696.377	5	0	7	16	10.44	0.15	0.31	0.45	0.14	0.32	0.1	599	0.4	39.62	0.045	WDR33:288:x:WDR33:321	#N/A
1	NLKEELQVFR-KAVNR-a3-b1	WDR33	WDR33	xlink	intra-protein xl	321	50	271	1999.12	500.788	4	-0.7	1	4	9.08	0.3	0.51	0.43	0.4	0.03	0.06	452	0.43	38.41	0.045	WDR33:321:x:WDR33:50	#N/A
1	RPDFAQQQAMQQLTFDGKR-VKCPVFVVR-a18-b2	WDR33	WDR33	xlink	intra-protein xl	46	119	73	3504.81	877.211	4	0.3	2	7	8.77	0.32	0.3	0.45	0.34	0.11	0.08	655	0.09	37.3	0.048	WDR33:119:x:WDR33:46	#N/A
1	RPDFAQQQAMQQLTFDGKR-KTIDYNPSVIK-a18-b1	WDR33	WDR33	xlink	intra-protein xl	46	55	9	3678.88	920.727	4	-2.1	4	11	8.96	0.14	0.43	0.41	0.3	0.11	0.07	451	0.12	36.13	0.048	WDR33:46:x:WDR33:55	#N/A
1	RPDFAQQQAMQQLTFDGKR-NRPGDKMR-a18-b6	WDR33	WDR33	xlink	intra-protein xl	46	410	364	3374.67	675.941	5	-1.4	2	4	7.84	0.16	0.36	0.62	0.61	0.01	0.08	568	0.91	34.83	0.067	WDR33:410:x:WDR33:46	#N/A
1	VKCPVFVVR-KAVNR-a2-b1	WDR33	WDR33	xlink	intra-protein xl	119	50	69	1827.06	457.771	4	-0.4	2	3	8.45	0.31	0.36	0.59	0.58	0.01	0.08	442	0.45	34.15	0.07	WDR33:119:x:WDR33:50	#N/A
1	KTIDYNPSVIK-TSTNKVK-a1-b5	WDR33	WDR33	xlink	intra-protein xl	55	117	62	2191.21	548.811	4	0.4	2	6	9.14	0.18	0.19	0.35	0.29	0.06	0.06	599	0.36	34.1	0.07	WDR33:117:x:WDR33:55	#N/A
1	KTIDYNPSVIK-NRPGDKMR-a1-b6	WDR33	WDR33	xlink	intra-protein xl	55	410	355	2387.27	597.825	4	2.1	5	4	7.95	0.24	0.39	0.41	0.39	0.02	0.07	454	0.9	33.69	0.07	WDR33:410:x:WDR33:55	#N/A
1	NRPGDKMR-KAVNRK-a6-b1	WDR33	WDR33	xlink	intra-protein xl	410	50	360	1825.01	366.009	5	-3.3	2	5	9.13	0.22	0.5	0.21	0.18	0.04	0.04	169	0.66	32.79	0.07	WDR33:410:x:WDR33:50	#N/A
1	GHGADVKCVDWHPTK-GLVVSGSKDSQQPIK-a7-b8	WDR33	WDR33	xlink	intra-protein xl	248	264	16	3385.71	678.149	5	-0.6	14	9	9.02	0.17	0.27	0.54	0.03	0.52	0.1	409	0.28	32.63	0.07	WDR33:248:x:WDR33:264	#N/A
1	EASFSPTDNKFATCSDDGTVR-KAVNR-a10-b1	WDR33	WDR33	xlink	intra-protein xl	216	50	166	3028.41	758.111	4	-2.6	2	5	8.63	0.17	0.3	0.3	0.27	0.03	0.05	414	0	31.79	0.07	WDR33:216:x:WDR33:50	#N/A
1	QLFYKRPDFAQQQAMQQLTFDGKR-KAVNRK-a5-b1	WDR33	WDR33	xlink	intra-protein xl	28	50	22	3796.01	633.676	6	3.1	3	3	6.89	0.08	0.34	0.27	0.26	0.01	0.03	486	0.41	30.13	0.079	WDR33:28:x:WDR33:50	#N/A
