# Supplementary material for: Structural insights into the assembly and polyA signal recognition mechanism of the human CPSF complex
Source: eLife. 2017 Dec 23;6:e33111. doi: 10.7554/eLife.33111 (PMC5760199; doi:10.7554/eLife.33111)
Supplement: Supplementary file 1. — The table also specifies which protein constructs were combined in a single vector using the MacroBac system (see Materials and methods), and whether a single baculovirus was used for protein expression or a combination of two baculoviruses. [file elife-33111-supp1.xlsx]

## Sheet: Sheet1
Constructs used for crosslinking - mass spectrometry
Vector	Vect. Addgene ID		Tag	Protein	construct	residues
5B	#30122	cassette 1	His6	CPSF30	CPSF30FL	1-243	Plasmid	Virus	Coinfection
		cassette 2	-	CPSF160	CPSF160FL	1-1443
5B	#30122	cassette 1	His6	Fip1	Fip1FL	1-378	Plasmid	Virus
		cassette 2	(StrepII)2	WDR33	WDR33M1-G474	1-474
Constructs used for crystallization
Vector			Tag	Protein	construct	residues
5B	#30122	cassette 1	His6-GST	WDR33	WDR33Q35-K410	1-410	Plasmid	Virus	Infection
		cassette 2	-	CPSF160	CPSF160FL	1-1443
Constructs used for pulldowns
Vector		Tag	Protein	construct	residues
438B	#55219	His6	CPSF160	CPSF160FL	1-1443	Plasmid	Plasmids combined with MacroBac system	Virus	Coinfection (Fig. 3A lane 1)
438B1	#55219	His6-(StrepII)2	WDR33	WDR33M1-K410	1-410	Plasmid
438Rgfp2	#55211	GFP (No StrepII)	CPSF30	CPSF30FL	1-243	Plasmid	-	Virus
438B	#55219	His6	CPSF160	CPSF160FL	1-1443	Plasmid	Plasmids combined with MacroBac system	Virus	Coinfection (Fig. 3A lane 2)
438B1	#55219	His6-(StrepII)2	WDR33	WDR33M1-K410	1-410	Plasmid
438Rgfp2	#55211	GFP (No StrepII)	CPSF30	CPSF30ZF1-5	1-178	Plasmid	-	Virus
438B	#55219	His6	CPSF160	CPSF160FL	1-1443	Plasmid	Plasmids combined with MacroBac system	Virus	Coinfection (Fig. 3A lane 3)
438B1	#55219	His6-(StrepII)2	WDR33	WDR33M1-K410	1-410	Plasmid
438Rgfp2	#55211	GFP (No StrepII)	CPSF30	CPSF30ZF1-3	1-117	Plasmid	-	Virus
438B	#55219	His6	CPSF160	CPSF160FL	1-1443	Plasmid	Plasmids combined with MacroBac system	Virus	Coinfection (Fig. 3A lane 4)
438B1	#55219	His6-(StrepII)2	WDR33	WDR33M1-K410	1-410	Plasmid
438Rgfp2	#55211	GFP (No StrepII)	CPSF30	CPSF30ZF1	1-61	Plasmid	-	Virus
438B	#55219	His6	CPSF160	CPSF160FL	1-1443	Plasmid	Plasmids combined with MacroBac system	Virus	Coinfection (Fig. 3A lane 5)
438B1	#55219	His6-(StrepII)2	WDR33	WDR33M1-K410	1-410	Plasmid
438Rgfp2	#55211	GFP (No StrepII)	CPSF30	CPSF30ZF2-5	62-178	Plasmid	-	Virus
438B	#55219	His6	CPSF160	CPSF160FL	1-1443	Plasmid	Plasmids combined with MacroBac system	Virus	Coinfection (Fig. 3A lane 6)
438B1	#55219	His6-(StrepII)2	WDR33	WDR33M1-K410	1-410	Plasmid
438Rgfp2	#55211	GFP (No StrepII)	CPSF30	CPSF30ZF1-5DN	1-178 (D1-34)	Plasmid	-	Virus
438B	#55219	His6	CPSF160	CPSF160FL	1-1443	Plasmid	Plasmids combined with MacroBac system	Virus	Coinfection (Fig. 3A lane 7)
438B1	#55219	His6-(StrepII)2	WDR33	WDR33M1-K410	1-410	Plasmid
438Rgfp2	#55211	GFP (No StrepII)	CPSF30	CPSF30N	1-34	Plasmid	-	Virus
438B	#55219	His6	CPSF160	CPSF160FL	1-1443	Plasmid	Plasmids combined with MacroBac system	Virus	Coinfection (Fig. 3B lane 1)
438B1	#55219	His6-(StrepII)2	WDR33	WDR33M1-K410	1-410	Plasmid
438A	#55218	-	CPSF30	CPSF30FL	1-243	Plasmid	Plasmids combined with MacroBac system
438Rgfp2	#55211	GFP (No StrepII)	Fip1	Fip1FL	1-378	Plasmid	-	Virus
438B	#55219	His6	CPSF160	CPSF160FL	1-1443	Plasmid	Plasmids combined with MacroBac system	Virus	Coinfection (Fig. 3B lane 2)
438B1	#55219	His6-(StrepII)2	WDR33	WDR33M1-K410	1-410	Plasmid
438Rgfp2	#55211	GFP (No StrepII)	Fip1	Fip1FL	1-378	Plasmid	-	Virus
438B	#55219	His6	CPSF160	CPSF160FL	1-1443	Plasmid	Plasmids combined with MacroBac system	Virus	Coinfection (Fig. 3B lane 3)
438B1	#55219	His6-(StrepII)2	WDR33	WDR33M1-K410	1-410	Plasmid
438A	#55218	-	CPSF30	CPSF30FL	1-243	Plasmid	Plasmids combined with MacroBac system
438Rgfp2	#55211	GFP (No StrepII)	Fip1	Fip1CD	130-195	Plasmid	-	Virus
438B	#55219	His6	CPSF160	CPSF160FL	1-1443	Plasmid	Plasmids combined with MacroBac system	Virus	Coinfection (Fig. 3B lane 4)
438B1	#55219	His6-(StrepII)2	WDR33	WDR33M1-K410	1-410	Plasmid
438Rgfp2	#55211	GFP (No StrepII)	Fip1	Fip1CD	130-195	Plasmid	-	Virus
438B	#55219	His6	CPSF160	CPSF160FL	1-1443	Plasmid	Plasmids combined with MacroBac system	Virus	Coinfection (Fig. 3C lane 1)
438B1	#55219	His6-(StrepII)2	WDR33	WDR33M1-K410	1-410	Plasmid
438A	#55218	-	CPSF30	CPSF30FL	1-243	Plasmid	Plasmids combined with MacroBac system
438Rgfp2	#55211	GFP (No StrepII)	Fip1	Fip1CD	130-195	Plasmid	-	Virus
438B	#55219	His6	CPSF160	CPSF160FL	1-1443	Plasmid	Plasmids combined with MacroBac system	Virus	Coinfection (Fig. 3C lane 2)
438B1	#55219	His6-(StrepII)2	WDR33	WDR33M1-K410	1-410	Plasmid
438A	#55218	-	CPSF30	CPSF30ZF1-5	1-178	Plasmid	Plasmids combined with MacroBac system
438Rgfp2	#55211	GFP (No StrepII)	Fip1	Fip1CD	130-195	Plasmid	-	Virus
438B	#55219	His6	CPSF160	CPSF160FL	1-1443	Plasmid	Plasmids combined with MacroBac system	Virus	Coinfection (Fig. 3C lane 3)
438B1	#55219	His6-(StrepII)2	WDR33	WDR33M1-K410	1-410	Plasmid
438A	#55218	-	CPSF30	CPSF30ZF1-4	1-144	Plasmid	Plasmids combined with MacroBac system
438Rgfp2	#55211	GFP (No StrepII)	Fip1	Fip1CD	130-195	Plasmid	-	Virus
438B	#55219	His6	CPSF160	CPSF160FL	1-1443	Plasmid	Plasmids combined with MacroBac system	Virus	Coinfection (Fig. 3C lane 4)
438B1	#55219	His6-(StrepII)2	WDR33	WDR33M1-K410	1-410	Plasmid
438A	#55218	-	CPSF30	CPSF30ZF1-3	1-117	Plasmid	Plasmids combined with MacroBac system
438Rgfp2	#55211	GFP (No StrepII)	Fip1	Fip1CD	130-195	Plasmid	-	Virus
438B	#55219	His6	CPSF160	CPSF160FL	1-1443	Plasmid	Plasmids combined with MacroBac system	Virus	Coinfection (Fig. 3C lane 5)
438B1	#55219	His6-(StrepII)2	WDR33	WDR33M1-K410	1-410	Plasmid
438A	#55218	-	CPSF30	CPSF30ZF1	1-61	Plasmid	Plasmids combined with MacroBac system
438Rgfp2	#55211	GFP (No StrepII)	Fip1	Fip1CD	130-195	Plasmid	-	Virus
438B1	#55218	His6-(StrepII)2	CPSF30	CPSF30ZF4-5	118-178	Plasmid	-	Virus	Coinfection (Fig. 3C lane 6)
438Rgfp*	#55211	GFP (No StrepII)	Fip1	Fip1CD	130-195	Plasmid	-	Virus
Constructs used for fluorescence polarization assays
Vector		Tag	Protein	construct	residues
438B	#55219	His6	CPSF160	CPSF160FL	1-1443	Plasmid	Plasmids combined with MacroBac system	Virus	Infection
438B1	#55219	His6-(StrepII)2	WDR33	WDR33M1-K410	1-410	Plasmid
438A	#55218	-	CPSF30	CPSF30FL	1-243	Plasmid	Plasmids combined with MacroBac system
438B	#55219	His6	Fip1	Fip1FL	1-378	Plasmid
438B	#55219	His6	CPSF160	CPSF160FL	1-1443	Plasmid	Plasmids combined with MacroBac system	Virus	Infection
438B1	#55219	His6-(StrepII)2	WDR33	WDR33M1-K410	1-410	Plasmid
438A	#55218	-	CPSF30	CPSF30ZF1-5	1-178	Plasmid	Plasmids combined with MacroBac system
438Rgfp	#55211	StrepII-GFP	Fip1	Fip1CD	130-195	Plasmid
438B	#55219	His6	CPSF160	CPSF160FL	1-1443	Plasmid	Plasmids combined with MacroBac system	Virus	Infection
438B1	#55219	His6-(StrepII)2	WDR33	WDR33M1-K410	1-410	Plasmid
438A	#55218	-	CPSF30	CPSF30ZF1-3	1-117	Plasmid	Plasmids combined with MacroBac system
438B	#55219	His6	CPSF160	CPSF160FL	1-1443	Plasmid	Plasmids combined with MacroBac system	Virus	Infection
438B1	#55219	His6-(StrepII)2	WDR33	WDR33M1-K410	1-410	Plasmid
438A	#55218	-	CPSF30	CPSF30ZF1-2	1-93	Plasmid	Plasmids combined with MacroBac system
438B	#55219	His6	CPSF160	CPSF160FL	1-1443	Plasmid	Plasmids combined with MacroBac system	Virus	Infection
438B1	#55219	His6-(StrepII)2	WDR33	WDR33M1-K410	1-410	Plasmid
438A	#55218	-	CPSF30	CPSF30ZF1	1-61	Plasmid	Plasmids combined with MacroBac system
438B	#55219	His6	CPSF160	CPSF160FL	1-1443	Plasmid	Plasmids combined with MacroBac system	Virus	Infection
438B1	#55219	His6-(StrepII)2	WDR33	WDR33M1-K410	1-410	Plasmid
438B	#55219	His6	CPSF160	CPSF160FL	1-1443	Plasmid	Plasmids combined with MacroBac system	Virus	Coinfection
438A	#55219	-	CPSF30	CPSF30ZF1-3	1-117	Plasmid
438B1	#55219	His6-(StrepII)2	WDR33	WDR33M1-K410	1-410 K46A/R47A	Plasmid	-	Virus
438B	#55219	His6	CPSF160	CPSF160FL	1-1443	Plasmid	Plasmids combined with MacroBac system	Virus	Coinfection
438A	#55219	-	CPSF30	CPSF30ZF1-3	1-117	Plasmid
438B1	#55219	His6-(StrepII)2	WDR33	WDR33M1-K410	1-410 R49A/K50A	Plasmid	-	Virus
1: engineered version of the 438B vector carrying a tandem StrepII tag following the His6 tag
2: engineered version of the 438Rgfp vector lacking the StrepII tag
